# Supplementary material for: Greater adherence to the Mediterranean Dietary Approaches to Stop Hypertension Intervention for Neurodegenerative Delay (MIND) diet is associated with lower risk of inflammatory bowel disease: a prospective cohort study
Source: Royal Society of Chemistry journal article supplement (doi:10.1039/d4fo00641k), 2024-01-01
Supplement: d4fo00641k3.pdf [file d4fo00641k3.pdf]

Supplementary materials of

**Greater Adherence to Mediterranean Dietary Approaches to Stop Hypertension Intervention for Neurodegenerative Delay (MIND) Diet is Associated with Lower Risk of Inflammatory Bowel Disease: A Prospective Cohort Study**

**Content**

|                                                                                                                                                                                                                                        |           |
|----------------------------------------------------------------------------------------------------------------------------------------------------------------------------------------------------------------------------------------|-----------|
| <b>Table S1. MIND diet component servings and scoring .....</b>                                                                                                                                                                        | <b>2</b>  |
| <b>Table S2. Definitions of covariables in the analysis .....</b>                                                                                                                                                                      | <b>3</b>  |
| <b>Table S3. Missing numbers and rates of covariables .....</b>                                                                                                                                                                        | <b>5</b>  |
| <b>Table S4. Baseline characteristics of participants with and without dietary information collected from the Oxford WebQ.....</b>                                                                                                     | <b>6</b>  |
| <b>Table S5. Multivariable-adjusted hazard ratios and 95% confidence intervals for incident inflammatory bowel disease and its subtypes according to food components in MIND diet .....</b>                                            | <b>7</b>  |
| <b>Table S6. Multivariable-adjusted hazard ratios and 95% confidence intervals for incident Crohn's disease based on Montreal classification according to tertiles of MIND diet score.....</b>                                         | <b>9</b>  |
| <b>Table S7. Multivariable-adjusted hazard ratios and 95% confidence intervals for incident ulcerative colitis based on Montreal classification according to tertiles of MIND diet score .....</b>                                     | <b>10</b> |
| <b>Table S8. Multivariable-adjusted hazard ratios and 95% confidence intervals for incident inflammatory bowel disease and its subtypes according to tertiles of MIND diet score stratified by age, sex, and body mass index .....</b> | <b>11</b> |
| <b>Table S9. Multivariable-adjusted hazard ratios and 95% confidence intervals for incident inflammatory bowel disease and its subtypes according to tertiles of MIND diet score in the sensitivity analysis.....</b>                  | <b>13</b> |
| <b>Figure S1. Restricted cubic spline of the association between MIND diet score and risk of IBD, CD, and UC .....</b>                                                                                                                 | <b>15</b> |

**Table S1. MIND diet component servings and scoring**

| MIND diet component    | Example food items in the Oxford WebQ                                                                                                          | Scoring             |                       |                  |
|------------------------|------------------------------------------------------------------------------------------------------------------------------------------------|---------------------|-----------------------|------------------|
|                        |                                                                                                                                                | 0                   | 0.5                   | 1                |
| Green leafy vegetables | Cabbage/kale, lettuce, spinach                                                                                                                 | ≤2 servings/wk      | >2 to <6 servings/wk  | ≥6 servings/wk   |
| Other vegetables       | Green beans, broccoli, butternut squash, carrot, cauliflower, celery, cucumber, leek, mushroom, sweet pepper, sprouts, sweetcorn, sweet potato | <5 servings/wk      | 5 to <7 servings/wk   | ≥1 servings/d    |
| Berries                | Berries                                                                                                                                        | <1 serving/wk       | 1 serving/wk          | ≥2 servings/wk   |
| Nuts                   | Nuts, peanuts, seeds, peanut butter                                                                                                            | <1 serving/m        | 1/m to <5 servings/wk | ≥5 servings/wk   |
| Olive oil              | Participants used olive oil in cooking across all diet records that reported using fat/oil in cooking                                          | No primary oil      |                       | Primary oil used |
| Butter/margarine       | Butter/margarine on bread/crackers and potatoes                                                                                                | >2 tsp/d            | 1–2 tsp/d             | <1 tsp/d         |
| Cheese                 | Hard cheese, soft cheese, cheese spread, cottage cheese, mozzarella, goat's cheese                                                             | ≥7 servings/wk      | 1 to 6 servings/wk    | <1 serving/wk    |
| Whole grains           | Porridge, whole-wheat cereal/breads, wholemeal pasta, brown rice                                                                               | <1 serving/d        | 1–2 servings/d        | ≥3 servings/d    |
| Fish (not fried)       | Tinned tuna, oily fish, white fish, prawns, lobster/crab, shellfish                                                                            | <1 serving/m        | 1 to 3 servings/m     | ≥1 servings/wk   |
| Beans                  | Baked bean, pulses, broad bean, hummus, tofu                                                                                                   | <1 serving/wk       | 1–3 servings/wk       | >3 servings/wk   |
| Poultry (not fried)    | Poultry                                                                                                                                        | <1 serving/wk       | 1 serving/wk          | ≥2 servings/wk   |
| Red meat and products  | Sausage, beef, pork, lamb, bacon, ham                                                                                                          | ≥7 servings/wk      | 4–6 servings/wk       | <4 servings/wk   |
| Fast/fried foods       | Fried poultry, breaded fish, fried potatoes, crisp/chips                                                                                       | ≥4 servings/wk      | 1–3 servings/wk       | <1 serving/wk    |
| Pastries and sweets    | Pastry, crumble, pancake, pudding, ice-cream, cake, doughnut, chocolate bar, biscuits, hot chocolate, fizzy drink, added sugars and preserves  | ≥7 servings/wk      | 5–6 servings/wk       | <5 servings/wk   |
| Wine                   | Red wine, rose wine, white wine, fortified wine                                                                                                | >1 glass/d or never | 1/m to 6/wk           | 1 glass/d        |

**Table S2. Definitions of covariables in the analysis**

| <b>Covariables</b>         | <b>Definitions</b>                                                                                                                                                                                                                                                                                                                                                                                                                                                                                                                                                                  |
|----------------------------|-------------------------------------------------------------------------------------------------------------------------------------------------------------------------------------------------------------------------------------------------------------------------------------------------------------------------------------------------------------------------------------------------------------------------------------------------------------------------------------------------------------------------------------------------------------------------------------|
| Age at recruitment         | Continuous variable.<br>Age at recruitment is based on the participant's date of birth and date of attendance at the initial assessment centre. Refers to the age of the participant on the date of attendance at the initial assessment centre, truncated to a full year.                                                                                                                                                                                                                                                                                                          |
| Sex                        | Categorical variable, men and women.<br>Acquired from central registry at recruitment.                                                                                                                                                                                                                                                                                                                                                                                                                                                                                              |
| Race                       | Categorical variable, white and non-white.<br>UK Biobank touch-screen questionnaire asked about the ethnic background: White included British, Irish, and any other white background.                                                                                                                                                                                                                                                                                                                                                                                               |
| Education                  | Categorical variable, college or university degree and above, and high school and below (A levels/AS levels or equivalent, O levels/GCSEs or equivalent, CSEs or equivalent, NVQ or HND or HNC or equivalent, other professional qualifications eg: nursing, teaching, and none of the above).<br>UK Biobank touch-screen questionnaire asked about the possession of qualifications.                                                                                                                                                                                               |
| Townsend deprivation index | Continuous variable.<br>Townsend deprivation index was conducted as a complex indicator of socioeconomic status based on the preceding national census output areas at recruitment using the method mentioned online ( <a href="https://biobank.ndph.ox.ac.uk/showcase/label.cgi?id=76">https://biobank.ndph.ox.ac.uk/showcase/label.cgi?id=76</a> ).                                                                                                                                                                                                                               |
| Smoking status             | Self-reported current/past smoking status of the participant. We classified the responses into: never smoked, previous, and current smoker.                                                                                                                                                                                                                                                                                                                                                                                                                                         |
| Physical activity          | Categorical variable, regular and irregular.<br>UK Biobank touch-screen questionnaire on the reported type and duration of physical activity (including walking, DIY, moderate and vigorous physical activity, strenuous sports, etc).<br>One of the following is equal to 1 score:<br>1. $\geq 150$ minutes of moderate activity per week.<br>2. $\geq 75$ minutes of vigorous activity per week.<br>3. Equivalent combination.<br>4. Moderate physical activity at least 5 days a week or vigorous activity once a week.<br>1 score and more indicated regular physical activity. |
| Body mass index            | Continuous variable, weight/height <sup>2</sup> , kg/m <sup>2</sup> .                                                                                                                                                                                                                                                                                                                                                                                                                                                                                                               |
| Cancer history             | Categorical variable, with and without.<br>According to self-reported code for cancer history.                                                                                                                                                                                                                                                                                                                                                                                                                                                                                      |

| <b>Covariables</b>     | <b>Definitions</b>                                                                                                                                                                                                                                                                                                                                                                                                                                                                                         |
|------------------------|------------------------------------------------------------------------------------------------------------------------------------------------------------------------------------------------------------------------------------------------------------------------------------------------------------------------------------------------------------------------------------------------------------------------------------------------------------------------------------------------------------|
| Total energy           | Total energy from overall diet was estimated from the mean intake of the Oxford WebQ.                                                                                                                                                                                                                                                                                                                                                                                                                      |
| Total sugar            | Total sugar from overall diet was estimated from the mean intake of the Oxford WebQ.                                                                                                                                                                                                                                                                                                                                                                                                                       |
| Depression symptom     | Categorical variable, with and without.<br>UK Biobank touch-screen questionnaire on psychological factors and mental health asked two questions:<br>Over the past two weeks, how often have you felt down, depressed, or hopeless? Over the past two weeks, how often have you had little interest or pleasure in doing things?<br>Scores: 0 (not at all); 1 (several days); 2 (more than half the days); 3 (nearly every day); scored equal to or more than 3 was considered to have depression symptoms. |
| Cardiovascular disease | Categorical variable, with and without.<br>According to the International Classification of Diseases (ICD) codes: ICD-9: 410-414, 362.3, 430-431, 433-436, 440, 443.9, and ICD-10: I20-I25, H34.1, I60-I61, I63-I64, G45, I70, I73.9.                                                                                                                                                                                                                                                                      |
| Diabetes               | Categorical variable, with and without.<br>According to the International Classification of Diseases (ICD) codes: ICD-9: 250 and ICD-10: E10-E14.                                                                                                                                                                                                                                                                                                                                                          |
| Stroke                 | Categorical variable, with and without.<br>According to the International Classification of Diseases (ICD) codes: ICD-9: 362.3, 430-431, 433-434, 436 and ICD-10: H34.1, I60-I61, I63-I64.                                                                                                                                                                                                                                                                                                                 |
| INFLA score            | Continuous variable.<br>Aliquoted the four indicators (C-reactive protein, white blood cell count, platelet count, and the neutrophil-to-lymphocyte ratio), with the highest four deciles assigned values +1 to +4 (7 <sup>th</sup> to 10 <sup>th</sup> ) and the lowest four deciles assigned values -4 to -1 (1 <sup>st</sup> to 4 <sup>th</sup> ) and summed to obtain the INFLA score.                                                                                                                 |
| Metabolic disorder     | Having the number of abnormalities $\geq 3$ of:<br>Glucose Random glucose level $\geq 11.1$ mmol/L or glycated hemoglobin (HbA1c) level $\geq 48.0$ mmol/mol<br>High-density lipoprotein cholesterol Men: $<1.0$ mmol/L; Women: $<1.3$ mmol/L<br>Triglycerides $\geq 1.7$ mmol/L<br>Obesity Waist; Men: $\geq 102$ cm; Women: $\geq 88$ cm<br>Hypertension $\geq 130/85$ mmHg                                                                                                                              |

**Table S3. Missing numbers and rates of covariables**

| <b>Covariables</b> | <b>Missing number</b> | <b>Missing rate (%)</b> |
|--------------------|-----------------------|-------------------------|
|--------------------|-----------------------|-------------------------|

|                            |        |       |
|----------------------------|--------|-------|
| Townsend deprivation index | 226    | 0.12  |
| Body mass index            | 513    | 0.27  |
| Education                  | 903    | 0.48  |
| Race                       | 70     | 0.04  |
| Smoking status             | 69     | 0.04  |
| Physical activity          | 1,828  | 0.97  |
| Depression                 | 8,722  | 4.65  |
| Cancer history             | 478    | 0.25  |
| INFLA score                | 16,003 | 8.54  |
| Metabolic disorder         | 43,975 | 23.45 |

---

**Table S4. Baseline characteristics of participants with and without dietary information collected from the Oxford WebQ.**

| Characteristic                            | Dietary information from the Oxford WebQ |                     |
|-------------------------------------------|------------------------------------------|---------------------|
|                                           | With (n=210,988)                         | Without (n=291,473) |
| Age, mean (SD )                           | 56.08 (7.95)                             | 56.85 (8.18)        |
| Females, n (%)                            | 116,225 (55.1)                           | 157,128 (53.9)      |
| Townsend deprivation index, median (IQR ) | -1.57 (2.88)                             | -1.09 (3.23)        |
| Body mass index, mean (SD )               | 26.96 (4.66)                             | 27.78 (4.88)        |
| College degree and above, n (%)           | 89,744 (42.7)                            | 71,402 (25.3)       |
| White, n (%)                              | 201,266 (95.4)                           | 271,391 (93.4)      |
| Smoking status, n (%)                     |                                          |                     |
| Current                                   | 17,032 (8.1)                             | 37,996 (13.1)       |
| Previous                                  | 74,870 (35.5)                            | 98,174 (33.8)       |
| Never                                     | 119,002 (56.4)                           | 154,495 (53.2)      |
| Regular physical activity, n (%)          | 166,386 (79.6)                           | 217,809 (77.4)      |
| Cancer history                            | 15,969 (7.6)                             | 22,645 (7.8)        |
| Depression symptoms, n (%)                | 8841 (4.4)                               | 19,071 (7.2)        |
| Cardiovascular disease, n (%)             | 64,335 (30.5)                            | 104,453 (35.8)      |
| Diabetes, n (%)                           | 9224 (4.4)                               | 18,333 (6.3)        |
| Stroke, n (%)                             | 3284 (1.6)                               | 7089 (2.4)          |
| INFLA                                     | -0.65 (6.03)                             | 0.41 (6.11)         |

**Table S5. Multivariable-adjusted hazard ratios and 95% confidence intervals for incident inflammatory bowel disease and its subtypes according to food components in MIND diet <sup>a</sup>**

| Food component         | Score | Inflammatory bowel disease |              | Crohn's disease   |          | Ulcerative colitis       |              |
|------------------------|-------|----------------------------|--------------|-------------------|----------|--------------------------|--------------|
|                        |       | HR (95% CI)                | <i>P</i>     | HR (95% CI)       | <i>P</i> | HR (95% CI)              | <i>P</i>     |
| Green leafy vegetables | 0     | 1 (Ref.)                   |              | 1 (Ref.)          |          | 1 (Ref.)                 |              |
|                        | 0.5   | 1.07 (0.91, 1.26)          | 0.412        | 0.84 (0.61, 1.15) | 0.271    | 1.18 (0.97, 1.43)        | 0.091        |
|                        | 1     | 0.88 (0.72, 1.08)          | 0.219        | 0.95 (0.67, 1.35) | 0.776    | 0.85 (0.67, 1.09)        | 0.198        |
| Other vegetables       | 0     | 1 (Ref.)                   |              | 1 (Ref.)          |          | 1 (Ref.)                 |              |
|                        | 0.5   | 0.60 (0.31, 1.16)          | 0.129        | 0.54 (0.17, 1.78) | 0.315    | 0.63 (0.29, 1.38)        | 0.249        |
|                        | 1     | 1.05 (0.85, 1.30)          | 0.642        | 1.02 (0.70, 1.49) | 0.922    | 1.07 (0.83, 1.38)        | 0.614        |
| Berries                | 0     | 1 (Ref.)                   |              | 1 (Ref.)          |          | 1 (Ref.)                 |              |
|                        | 0.5   | 0.91 (0.65, 1.28)          | 0.588        | 0.65 (0.32, 1.33) | 0.239    | 1.03 (0.70, 1.51)        | 0.894        |
|                        | 1     | 0.96 (0.79, 1.15)          | 0.635        | 0.92 (0.66, 1.29) | 0.636    | 0.97 (0.78, 1.21)        | 0.799        |
| Nuts                   | 0     | 1 (Ref.)                   |              | 1 (Ref.)          |          | 1 (Ref.)                 |              |
|                        | 0.5   | 0.86 (0.70, 1.06)          | 0.151        | 0.84 (0.57, 1.22) | 0.358    | 0.87 (0.68, 1.11)        | 0.264        |
|                        | 1     | 0.86 (0.65, 1.15)          | 0.317        | 0.99 (0.60, 1.64) | 0.965    | 0.81 (0.57, 1.15)        | 0.245        |
| Olive oil              | 0     | 1 (Ref.)                   |              | 1 (Ref.)          |          | 1 (Ref.)                 |              |
|                        | 1     | 0.93 (0.81, 1.07)          | 0.289        | 0.86 (0.67, 1.11) | 0.243    | 0.96 (0.81, 1.13)        | 0.618        |
|                        | 0     | 1 (Ref.)                   |              | 1 (Ref.)          |          | 1 (Ref.)                 |              |
| Butter                 | 0.5   | 0.97 (0.81, 1.17)          | 0.764        | 0.94 (0.68, 1.31) | 0.728    | 0.99 (0.79, 1.22)        | 0.895        |
|                        | 1     | 0.85 (0.69, 1.04)          | 0.114        | 0.81 (0.56, 1.17) | 0.264    | 0.87 (0.68, 1.10)        | 0.244        |
|                        | 0     | 1 (Ref.)                   |              | 1 (Ref.)          |          | 1 (Ref.)                 |              |
| Cheese                 | 0.5   | <b>0.81 (0.65, 1.00)</b>   | <b>0.047</b> | 0.88 (0.59, 1.31) | 0.530    | <b>0.78 (0.61, 1.00)</b> | <b>0.050</b> |
|                        | 1     | 0.85 (0.70, 1.04)          | 0.110        | 0.94 (0.65, 1.36) | 0.749    | 0.82 (0.65, 1.03)        | 0.090        |
|                        | 0     | 1 (Ref.)                   |              | 1 (Ref.)          |          | 1 (Ref.)                 |              |
| Whole grains           | 0.5   | 0.91 (0.78, 1.06)          | 0.223        | 1.17 (0.89, 1.52) | 0.262    | <b>0.82 (0.68, 0.98)</b> | <b>0.028</b> |
|                        | 1     | 0.84 (0.62, 1.13)          | 0.252        | 0.73 (0.39, 1.36) | 0.317    | 0.88 (0.62, 1.24)        | 0.449        |
|                        | 0     | 1 (Ref.)                   |              | 1 (Ref.)          |          | 1 (Ref.)                 |              |
| Fish                   | 0.5   | 1.26 (0.65, 2.43)          | 0.499        | 0.43 (0.06, 3.07) | 0.399    | 1.65 (0.82, 3.34)        | 0.161        |
|                        | 1     | 0.88 (0.76, 1.01)          | 0.077        | 0.79 (0.60, 1.03) | 0.086    | 0.92 (0.77, 1.09)        | 0.327        |
|                        | 0     | 1 (Ref.)                   |              | 1 (Ref.)          |          | 1 (Ref.)                 |              |
| Beans                  | 0.5   | 0.92 (0.73, 1.16)          | 0.500        | 0.93 (0.61, 1.41) | 0.723    | 0.92 (0.70, 1.21)        | 0.567        |
|                        | 1     | 0.91 (0.74, 1.12)          | 0.392        | 0.95 (0.66, 1.39) | 0.805    | 0.90 (0.70, 1.15)        | 0.388        |

|             |     |                          |              |                          |              |                          |              |
|-------------|-----|--------------------------|--------------|--------------------------|--------------|--------------------------|--------------|
|             | 0   | 1 (Ref.)                 |              | 1 (Ref.)                 |              | 1 (Ref.)                 |              |
| Poultry     | 0.5 | 0.98 (0.74, 1.30)        | 0.896        | 0.89 (0.52, 1.51)        | 0.661        | 1.02 (0.73, 1.43)        | 0.892        |
|             | 1   | 1.01 (0.87, 1.18)        | 0.883        | 0.95 (0.71, 1.26)        | 0.720        | 1.04 (0.86, 1.25)        | 0.678        |
|             | 0   | 1 (Ref.)                 |              | 1 (Ref.)                 |              | 1 (Ref.)                 |              |
| Red meat    | 0.5 | 1.19 (0.92, 1.55)        | 0.187        | 1.28 (0.80, 2.04)        | 0.313        | 1.16 (0.85, 1.58)        | 0.355        |
|             | 1   | 0.95 (0.81, 1.10)        | 0.481        | 1.02 (0.77, 1.34)        | 0.898        | 0.92 (0.77, 1.10)        | 0.352        |
|             | 0   | 1 (Ref.)                 |              | 1 (Ref.)                 |              | 1 (Ref.)                 |              |
| Fried foods | 0.5 | <b>0.80 (0.65, 0.98)</b> | <b>0.032</b> | 0.77 (0.52, 1.12)        | 0.171        | 0.81 (0.63, 1.04)        | 0.096        |
|             | 1   | 0.88 (0.74, 1.05)        | 0.152        | 0.83 (0.61, 1.14)        | 0.254        | 0.90 (0.74, 1.11)        | 0.333        |
|             | 0   | 1 (Ref.)                 |              | 1 (Ref.)                 |              | 1 (Ref.)                 |              |
| Sweets      | 0.5 | 0.99 (0.68, 1.44)        | 0.962        | 0.56 (0.24, 1.26)        | 0.160        | 1.22 (0.80, 1.86)        | 0.348        |
|             | 1   | 0.95 (0.78, 1.15)        | 0.575        | <b>0.63 (0.43, 0.93)</b> | <b>0.021</b> | 1.11 (0.88, 1.40)        | 0.375        |
|             | 0   | 1 (Ref.)                 |              | 1 (Ref.)                 |              | 1 (Ref.)                 |              |
| Wine        | 0.5 | 0.95 (0.72, 1.23)        | 0.680        | 0.81 (0.48, 1.36)        | 0.428        | 1.00 (0.74, 1.37)        | 0.977        |
|             | 1   | <b>0.81 (0.66, 0.98)</b> | <b>0.034</b> | 0.91 (0.64, 1.28)        | 0.574        | <b>0.77 (0.60, 0.97)</b> | <b>0.030</b> |

*Abbreviations:* MIND, Mediterranean-Dietary Approaches to Stop Hypertension Intervention for Neurodegenerative Delay; HR, hazard ratios; CI, confidence interval.

<sup>a</sup> Models are adjusted for age, sex, Townsend deprivation index, body mass index, education, race, smoking status, physical activity, cancer history, total energy, and total sugar.



**Table S6. Multivariable-adjusted hazard ratios and 95% confidence intervals for incident Crohn's disease based on Montreal classification according to tertiles of MIND diet score <sup>a</sup>**

| MIND diet score       | L1 (Small bowel disease or terminal ileitis)                     |                          |              | L2 (Colon)         |                   |       |
|-----------------------|------------------------------------------------------------------|--------------------------|--------------|--------------------|-------------------|-------|
|                       | Cases/person-years                                               | HR (95% CI)              | P            | Cases/person-years | HR (95% CI)       | P     |
| Per 3-point increment |                                                                  | 0.71 (0.47, 1.06)        | 0.092        |                    | 1.30 (0.85, 1.99) | 0.235 |
| Tertile 1             | 33/683,251                                                       | 1 (Ref.)                 |              | 11/683,077         | 1 (Ref.)          |       |
| Tertile 2             | 18/765,961                                                       | 0.59 (0.34, 1.04)        | 0.069        | 24/765,983         | 1.45 (0.76, 2.75) | 0.258 |
| Tertile 3             | 13/556,758                                                       | 0.58 (0.30, 1.14)        | 0.116        | 11/556,741         | 1.24 (0.59, 2.60) | 0.563 |
| P value for trend     | □                                                                |                          | 0.141        | □                  |                   | 0.665 |
|                       | <b>L3/LX (Ileocecal Crohn's disease or location not defined)</b> |                          |              |                    |                   | □     |
| MIND diet score       | Cases/person-years                                               | HR (95% CI)              | P            |                    |                   |       |
| Per 3-point increment |                                                                  | <b>0.66 (0.50, 0.86)</b> | <b>0.002</b> |                    |                   |       |
| Tertile 1             | 61/683,446                                                       | 1 (Ref.)                 |              |                    |                   |       |
| Tertile 2             | 53/766,242                                                       | 0.79 (0.55, 1.13)        | 0.188        |                    |                   |       |
| Tertile 3             | 26/556,850                                                       | <b>0.53 (0.33, 0.84)</b> | <b>0.007</b> |                    |                   |       |
| P value for trend     | □                                                                |                          | <b>0.006</b> | □                  | □                 | □     |

*Abbreviations:* MIND, Mediterranean-Dietary Approaches to Stop Hypertension Intervention for Neurodegenerative Delay; HR, hazard ratios; CI, confidence interval.

<sup>a</sup> Models are adjusted for age, sex, Townsend deprivation index, body mass index, education, race, smoking status, physical activity, cancer history, total energy, and total sugar.

**Table S7. Multivariable-adjusted hazard ratios and 95% confidence intervals for incident ulcerative colitis based on Montreal classification according to tertiles of MIND diet score <sup>a</sup>**

| MIND diet score          | E1 (Ulcerative proctitis) |                          |              | E2 (Left-sided UC)      |                          |              |
|--------------------------|---------------------------|--------------------------|--------------|-------------------------|--------------------------|--------------|
|                          | Cases/person-years        | HR (95% CI)              | <i>P</i>     | Cases/person-years      | HR (95% CI)              | <i>P</i>     |
| Per 3-point increment    |                           | 1.00 (0.68, 1.47)        | 0.986        |                         | 0.89 (0.61, 1.30)        | 0.544        |
| Tertile 1                | 24/683,185                | 1 (Ref.)                 |              | 31/683,229              | 1 (Ref.)                 |              |
| Tertile 2                | 33/766,049                | 1.38 (0.80, 2.36)        | 0.244        | 21/765,965              | 0.76 (0.44, 1.31)        | 0.327        |
| Tertile 3                | 13/556,755                | 0.79 (0.39, 1.60)        | 0.511        | 19/556,803              | 0.95 (0.52, 1.74)        | 0.871        |
| <i>P</i> value for trend |                           |                          | 0.873        |                         |                          | 0.748        |
| MIND diet score          | E3 (Extensive UC)         |                          |              | EX (Extent not defined) |                          |              |
|                          | Cases/person-years        | HR (95% CI)              | <i>P</i>     | Cases/person-years      | HR (95% CI)              | <i>P</i>     |
| Per 3-point increment    |                           | 0.64 (0.41, 1.01)        | 0.053        |                         | 0.87 (0.74, 1.02)        | 0.096        |
| Tertile 1                | 25/683,190                | 1 (Ref.)                 |              | 161/683,994             | 1 (Ref.)                 |              |
| Tertile 2                | 22/765,988                | 0.83 (0.46, 1.49)        | 0.534        | 127/766,682             | <b>0.78 (0.62, 0.98)</b> | <b>0.036</b> |
| Tertile 3                | 6/556,710                 | <b>0.39 (0.16, 0.91)</b> | <b>0.030</b> | 93/557,268              | 0.81 (0.62, 1.05)        | 0.113        |
| <i>P</i> value for trend | □                         |                          | <b>0.025</b> |                         |                          | 0.109        |

*Abbreviations:* MIND, Mediterranean-Dietary Approaches to Stop Hypertension Intervention for Neurodegenerative Delay; HR, hazard ratios; CI, confidence interval; UC, ulcerative colitis.

<sup>a</sup> Models are adjusted for age, sex, Townsend deprivation index, body mass index, education, race, smoking status, physical activity, cancer history, total energy, and total sugar.

**Table S8. Multivariable-adjusted hazard ratios and 95% confidence intervals for incident inflammatory bowel disease and its subtypes according to tertiles of MIND diet score stratified by age, sex, and body mass index <sup>a</sup>**

| MIND diet score                             | Inflammatory bowel disease |                          |              | Crohn's disease    |                          |              | Ulcerative colitis |                          |              |
|---------------------------------------------|----------------------------|--------------------------|--------------|--------------------|--------------------------|--------------|--------------------|--------------------------|--------------|
|                                             | Cases/person-years         | HR (95% CI)              | <i>P</i>     | Cases/person-years | HR (95% CI)              | <i>P</i>     | Cases/person-years | HR (95% CI)              | <i>P</i>     |
| <b>Age</b>                                  |                            |                          |              |                    |                          |              |                    |                          |              |
| <b>Age ≥ 65</b>                             |                            |                          |              |                    |                          |              |                    |                          |              |
| Per 3-point increment                       |                            | <b>0.64 (0.48, 0.86)</b> | <b>0.003</b> |                    | 0.62 (0.37, 1.04)        | 0.073        |                    | <b>0.65 (0.46, 0.92)</b> | <b>0.015</b> |
| Tertile 1                                   | 59/108,467                 | 1 (Ref.)                 |              | 18/108,181         | 1 (Ref.)                 |              | 41/108,345         | 1 (Ref.)                 |              |
| Tertile 2                                   | 53/126,761                 | 0.81 (0.56, 1.19)        | 0.286        | 17/126,546         | 0.80 (0.41, 1.57)        | 0.514        | 36/126,651         | 0.82 (0.52, 1.29)        | 0.392        |
| Tertile 3                                   | 26/89,313                  | <b>0.57 (0.35, 0.91)</b> | <b>0.020</b> | 7/89,174           | 0.45 (0.18, 1.11)        | 0.082        | 19/89,273          | 0.62 (0.35, 1.10)        | 0.102        |
| <i>P</i> value for trend                    |                            |                          | <b>0.020</b> |                    |                          | 0.084        |                    |                          | 0.099        |
| <b>Age &lt; 65</b>                          |                            |                          |              |                    |                          |              |                    |                          |              |
| Per 3-point increment                       |                            | 0.89 (0.79, 1.01)        | 0.063        |                    | 0.83 (0.66, 1.04)        | 0.106        |                    | 0.92 (0.79, 1.06)        | 0.244        |
| Tertile 1                                   | 287/576,787                | 1 (Ref.)                 |              | 87/575,557         | 1 (Ref.)                 |              | 200/576,189        | 1 (Ref.)                 |              |
| Tertile 2                                   | 245/641,098                | 0.86 (0.72, 1.02)        | 0.083        | 78/639,970         | 0.89 (0.65, 1.22)        | 0.465        | 167/640,527        | 0.84 (0.68, 1.04)        | 0.109        |
| Tertile 3                                   | 155/468,483                | <b>0.79 (0.65, 0.98)</b> | <b>0.028</b> | 43/467,814         | 0.72 (0.49, 1.06)        | 0.096        | 112/468,216        | 0.83 (0.65, 1.05)        | 0.122        |
| <i>P</i> value for trend                    |                            |                          | <b>0.022</b> |                    |                          | 0.099        |                    |                          | 0.095        |
| <i>P</i> value for interaction <sup>b</sup> |                            |                          | 0.614        |                    |                          | 0.827        |                    |                          | 0.737        |
| <b>Sex</b>                                  |                            |                          |              |                    |                          |              |                    |                          |              |
| <b>Female</b>                               |                            |                          |              |                    |                          |              |                    |                          |              |
| Per 3-point increment                       |                            | <b>0.85 (0.72, 0.99)</b> | <b>0.041</b> |                    | <b>0.68 (0.51, 0.91)</b> | <b>0.009</b> |                    | 0.93 (0.77, 1.13)        | 0.479        |
| Tertile 1                                   | 143/298,683                | 1 (Ref.)                 |              | 48/298,100         | 1 (Ref.)                 |              | 95/298,344         | 1 (Ref.)                 |              |
| Tertile 2                                   | 151/432,814                | 0.82 (0.65, 1.04)        | 0.099        | 50/432,119         | 0.81 (0.54, 1.22)        | 0.315        | 101/432,449        | 0.83 (0.62, 1.10)        | 0.189        |
| Tertile 3                                   | 113/380,757                | <b>0.74 (0.57, 0.95)</b> | <b>0.020</b> | 26/380,214         | <b>0.50 (0.31, 0.83)</b> | <b>0.007</b> | 87/380,595         | 0.85 (0.63, 1.16)        | 0.310        |
| <i>P</i> value for trend                    |                            |                          | <b>0.020</b> |                    |                          | <b>0.007</b> |                    |                          | 0.313        |
| <b>Male</b>                                 |                            |                          |              |                    |                          |              |                    |                          |              |
| Per 3-point increment                       |                            | <b>0.84 (0.71, 0.99)</b> | <b>0.032</b> |                    | 0.93 (0.69, 1.25)        | 0.635        |                    | <b>0.80 (0.66, 0.97)</b> | <b>0.025</b> |
| Tertile 1                                   | 203/386,570                | 1 (Ref.)                 |              | 57/385,638         | 1 (Ref.)                 |              | 146/386,190        | 1 (Ref.)                 |              |

|                                       |             |                          |              |            |                          |              |             |                          |              |
|---------------------------------------|-------------|--------------------------|--------------|------------|--------------------------|--------------|-------------|--------------------------|--------------|
| Tertile 2                             | 147/335,045 | 0.86 (0.70, 1.07)        | 0.186        | 45/334,397 | 0.91 (0.61, 1.36)        | 0.645        | 102/334,728 | 0.85 (0.65, 1.09)        | 0.204        |
| Tertile 3                             | 68/177,040  | 0.77 (0.58, 1.02)        | 0.065        | 24/176,774 | 0.93 (0.57, 1.52)        | 0.771        | 44/176,894  | <b>0.70 (0.50, 0.99)</b> | <b>0.044</b> |
| <i>P</i> value for trend              |             |                          | <b>0.048</b> |            |                          | 0.710        |             |                          | <b>0.034</b> |
| <b><i>P</i> value for interaction</b> |             |                          | 0.647        |            |                          | 0.103        |             |                          | 0.725        |
| <b>Body mass index</b>                |             |                          |              |            |                          |              |             |                          |              |
| <b>BMI ≥ 30</b>                       |             |                          |              |            |                          |              |             |                          |              |
| Per 3-point increment                 |             | 0.81 (0.64, 1.02)        | 0.067        |            | 0.78 (0.53, 1.15)        | 0.214        |             | 0.82 (0.62, 1.09)        | 0.173        |
| Tertile 1                             | 97/175,809  | 1 (Ref.)                 |              | 31/175,410 | 1 (Ref.)                 |              | 66/175,585  | 1 (Ref.)                 |              |
| Tertile 2                             | 75/152,543  | 0.93 (0.69, 1.27)        | 0.656        | 31/152,251 | 1.19 (0.71, 1.97)        | 0.510        | 44/152,330  | 0.81 (0.55, 1.20)        | 0.292        |
| Tertile 3                             | 32/88,552   | 0.70 (0.46, 1.06)        | 0.094        | 9/88,427   | 0.61 (0.28, 1.30)        | 0.201        | 23/88,497   | 0.75 (0.46, 1.22)        | 0.248        |
| <i>P</i> value for trend              |             |                          | 0.115        |            |                          | 0.365        |             |                          | 0.196        |
| <b>BMI &lt; 30</b>                    |             |                          |              |            |                          |              |             |                          |              |
| Per 3-point increment                 |             | <b>0.85 (0.75, 0.97)</b> | <b>0.014</b> |            | 0.79 (0.62, 1.01)        | 0.060        |             | 0.87 (0.75, 1.02)        | 0.086        |
| Tertile 1                             | 249/509,445 | 1 (Ref.)                 |              | 74/508,327 | 1 (Ref.)                 |              | 175/508,949 | 1 (Ref.)                 |              |
| Tertile 2                             | 223/615,316 | <b>0.81 (0.68, 0.98)</b> | <b>0.029</b> | 64/614,265 | 0.76 (0.54, 1.07)        | 0.118        | 159/614,848 | 0.84 (0.67, 1.04)        | 0.111        |
| Tertile 3                             | 149/469,244 | <b>0.75 (0.61, 0.93)</b> | <b>0.009</b> | 41/468,561 | <b>0.66 (0.44, 0.99)</b> | <b>0.044</b> | 108/468,992 | 0.79 (0.61, 1.02)        | 0.068        |
| <i>P</i> value for trend              |             |                          | <b>0.006</b> |            |                          | 0.060        |             |                          | 0.057        |
| <b><i>P</i> value for interaction</b> |             |                          | 0.590        | □          |                          | 0.244        | □           |                          | 0.993        |

*Abbreviations:* MIND, Mediterranean-Dietary Approaches to Stop Hypertension Intervention for Neurodegenerative Delay; HR, hazard ratios; CI, confidence interval.

<sup>a</sup> Adjusted for all covariates in Model 2 except for the one defining subgroup.

<sup>b</sup> Multiplicative interactions were tested by adding multiplicative interaction terms into the model.

**Table S9. Multivariable-adjusted hazard ratios and 95% confidence intervals for incident inflammatory bowel disease and its subtypes according to tertiles of MIND diet score in the sensitivity analysis <sup>a</sup>**

|                                   | MIND diet score          | Additionally adjusted for cardiovascular diseases |                                                          | Additionally adjusted for diabetes |                                                      | Additionally adjusted for stroke |                                              | Additionally adjusted for depression symptoms |                                                      |
|-----------------------------------|--------------------------|---------------------------------------------------|----------------------------------------------------------|------------------------------------|------------------------------------------------------|----------------------------------|----------------------------------------------|-----------------------------------------------|------------------------------------------------------|
|                                   |                          | HR (95% CI)                                       | <i>P</i>                                                 | HR (95% CI)                        | <i>P</i>                                             | HR (95% CI)                      | <i>P</i>                                     | HR (95% CI)                                   | <i>P</i>                                             |
| <b>Inflammatory bowel disease</b> | Per 3-point increment    | <b>0.84 (0.75, 0.94)</b>                          | <b>0.003</b>                                             | <b>0.84 (0.75, 0.94)</b>           | <b>0.002</b>                                         | <b>0.84 (0.75, 0.94)</b>         | <b>0.003</b>                                 | <b>0.84 (0.75, 0.94)</b>                      | <b>0.002</b>                                         |
|                                   | Tertile 1                | 1 (Ref.)                                          |                                                          | 1 (Ref.)                           |                                                      | 1 (Ref.)                         |                                              | 1 (Ref.)                                      |                                                      |
|                                   | Tertile 2                | <b>0.84 (0.72, 0.99)</b>                          | <b>0.037</b>                                             | <b>0.84 (0.72, 0.99)</b>           | <b>0.036</b>                                         | <b>0.84 (0.72, 0.99)</b>         | <b>0.036</b>                                 | <b>0.84 (0.72, 0.99)</b>                      | <b>0.036</b>                                         |
|                                   | Tertile 3                | <b>0.75 (0.62, 0.90)</b>                          | <b>0.003</b>                                             | <b>0.75 (0.62, 0.90)</b>           | <b>0.002</b>                                         | <b>0.75 (0.62, 0.90)</b>         | <b>0.002</b>                                 | <b>0.75 (0.62, 0.90)</b>                      | <b>0.002</b>                                         |
|                                   | <i>P</i> value for trend |                                                   | <b>0.002</b>                                             |                                    | <b>0.002</b>                                         |                                  | <b>0.002</b>                                 |                                               | <b>0.002</b>                                         |
|                                   |                          |                                                   | <b>With missing data multiple imputed</b>                |                                    | <b>Excluded new cases in first 3 years follow-up</b> |                                  | <b>Performed inverse probability weights</b> |                                               |                                                      |
|                                   |                          |                                                   | <b>HR (95% CI)</b>                                       | <b><i>P</i></b>                    | <b>HR (95% CI)</b>                                   | <b><i>P</i></b>                  | <b>HR (95% CI)</b>                           | <b><i>P</i></b>                               |                                                      |
|                                   | Per 3-point increment    | <b>0.86 (0.77, 0.97)</b>                          | <b>0.012</b>                                             | <b>0.81 (0.72, 0.92)</b>           | <b>0.001</b>                                         | <b>0.84 (0.75, 0.94)</b>         | <b>0.002</b>                                 |                                               |                                                      |
|                                   | Tertile 1                | 1 (Ref.)                                          |                                                          | 1 (Ref.)                           |                                                      | 1 (Ref.)                         |                                              |                                               |                                                      |
|                                   | Tertile 2                | 0.86 (0.73, 1.01)                                 | 0.065                                                    | 0.87 (0.74, 1.03)                  | 0.105                                                | <b>0.85 (0.72, 0.99)</b>         | <b>0.041</b>                                 |                                               |                                                      |
| Tertile 3                         | <b>0.78 (0.64, 0.94)</b> | <b>0.010</b>                                      | <b>0.71 (0.58, 0.87)</b>                                 | <b>0.001</b>                       | <b>0.75 (0.62, 0.91)</b>                             | <b>0.003</b>                     |                                              |                                               |                                                      |
| <i>P</i> value for trend          |                          | <b>0.008</b>                                      |                                                          | <b>0.001</b>                       |                                                      | <b>0.002</b>                     |                                              |                                               |                                                      |
| <b>Crohn's disease</b>            |                          |                                                   | <b>Additionally adjusted for cardiovascular diseases</b> |                                    | <b>Additionally adjusted for diabetes</b>            |                                  | <b>Additionally adjusted for stroke</b>      |                                               | <b>Additionally adjusted for depression symptoms</b> |
|                                   |                          |                                                   | <b>HR (95% CI)</b>                                       | <b><i>P</i></b>                    | <b>HR (95% CI)</b>                                   | <b><i>P</i></b>                  | <b>HR (95% CI)</b>                           | <b><i>P</i></b>                               | <b>HR (95% CI)</b>                                   |
|                                   | Per 3-point increment    | <b>0.79 (0.64, 0.97)</b>                          | <b>0.026</b>                                             | <b>0.79 (0.64, 0.97)</b>           | <b>0.023</b>                                         | <b>0.79 (0.64, 0.97)</b>         | <b>0.025</b>                                 | <b>0.79 (0.64, 0.97)</b>                      | <b>0.024</b>                                         |
|                                   | Tertile 1                | 1 (Ref.)                                          |                                                          | 1 (Ref.)                           |                                                      | 1 (Ref.)                         |                                              | 1 (Ref.)                                      |                                                      |
|                                   | Tertile 2                | 0.87 (0.66, 1.16)                                 | 0.344                                                    | 0.87 (0.65, 1.15)                  | 0.333                                                | 0.87 (0.66, 1.16)                | 0.339                                        | 0.87 (0.65, 1.16)                             | 0.335                                                |
|                                   | Tertile 3                | <b>0.67 (0.47, 0.95)</b>                          | <b>0.024</b>                                             | <b>0.66 (0.47, 0.94)</b>           | <b>0.022</b>                                         | <b>0.66 (0.47, 0.94)</b>         | <b>0.023</b>                                 | <b>0.66 (0.47, 0.94)</b>                      | <b>0.022</b>                                         |
|                                   | <i>P</i> value for trend |                                                   | <b>0.026</b>                                             |                                    | <b>0.023</b>                                         |                                  | <b>0.024</b>                                 |                                               | <b>0.024</b>                                         |
|                                   |                          |                                                   | <b>With missing data multiple imputed</b>                |                                    | <b>Excluded new cases in first 3 years follow-up</b> |                                  | <b>Performed inverse probability weights</b> |                                               |                                                      |
|                                   |                          |                                                   | <b>HR (95% CI)</b>                                       | <b><i>P</i></b>                    | <b>HR (95% CI)</b>                                   | <b><i>P</i></b>                  | <b>HR (95% CI)</b>                           | <b><i>P</i></b>                               |                                                      |
|                                   | Per 3-point increment    | 0.82 (0.67, 1.01)                                 | 0.064                                                    | <b>0.76 (0.61, 0.95)</b>           | <b>0.015</b>                                         | <b>0.79 (0.64, 0.98)</b>         | <b>0.033</b>                                 |                                               |                                                      |
| Tertile 1                         | 1 (Ref.)                 |                                                   | 1 (Ref.)                                                 |                                    | 1 (Ref.)                                             |                                  |                                              |                                               |                                                      |
| Tertile 2                         | 0.90 (0.67, 1.19)        | 0.446                                             | 0.86 (0.64, 1.15)                                        | 0.309                              | 0.87 (0.65, 1.15)                                    | 0.327                            |                                              |                                               |                                                      |
| Tertile 3                         | 0.71 (0.50, 1.01)        | 0.053                                             | <b>0.63 (0.43, 0.92)</b>                                 | <b>0.016</b>                       | <b>0.66 (0.46, 0.94)</b>                             | <b>0.021</b>                     |                                              |                                               |                                                      |

|                       |                                                   | 0.058                                         |                          | 0.017                                 |                          | 0.024                                         |                          |              |
|-----------------------|---------------------------------------------------|-----------------------------------------------|--------------------------|---------------------------------------|--------------------------|-----------------------------------------------|--------------------------|--------------|
| MIND diet score       | Additionally adjusted for cardiovascular diseases | Additionally adjusted for diabetes            |                          | Additionally adjusted for stroke      |                          | Additionally adjusted for depression symptoms |                          |              |
|                       | HR (95% CI)                                       | P                                             | HR (95% CI)              | P                                     | HR (95% CI)              | P                                             | HR (95% CI)              | P            |
| Per 3-point increment | <b>0.86 (0.75, 0.99)</b>                          | <b>0.033</b>                                  | <b>0.86 (0.75, 0.99)</b> | <b>0.032</b>                          | <b>0.86 (0.75, 0.99)</b> | <b>0.032</b>                                  | <b>0.86 (0.75, 0.99)</b> | <b>0.032</b> |
| Tertile 1             | 1 (Ref.)                                          |                                               | 1 (Ref.)                 |                                       | 1 (Ref.)                 |                                               | 1 (Ref.)                 |              |
| Tertile 2             | 0.83 (0.69, 1.01)                                 | 0.060                                         | 0.83 (0.69, 1.01)        | 0.059                                 | 0.83 (0.69, 1.01)        | 0.059                                         | 0.83 (0.69, 1.01)        | 0.059        |
| Tertile 3             | <b>0.78 (0.63, 0.98)</b>                          | <b>0.033</b>                                  | <b>0.78 (0.63, 0.98)</b> | <b>0.032</b>                          | <b>0.78 (0.63, 0.98)</b> | <b>0.032</b>                                  | <b>0.78 (0.62, 0.98)</b> | <b>0.032</b> |
| P value for trend     |                                                   | <b>0.024</b>                                  |                          | <b>0.023</b>                          |                          | <b>0.023</b>                                  |                          | <b>0.023</b> |
| MIND diet score       | With missing data multiple imputed                | Excluded new cases in first 3 years follow-up |                          | Performed inverse probability weights |                          |                                               |                          |              |
|                       | HR (95% CI)                                       | P                                             | HR (95% CI)              | P                                     | HR (95% CI)              | P                                             |                          |              |
| Per 3-point increment | 0.88 (0.77, 1.01)                                 | 0.074                                         | <b>0.84 (0.72, 0.97)</b> | <b>0.016</b>                          | <b>0.86 (0.75, 0.98)</b> | <b>0.025</b>                                  |                          |              |
| Tertile 1             | 1 (Ref.)                                          |                                               | 1 (Ref.)                 |                                       | 1 (Ref.)                 |                                               |                          |              |
| Tertile 2             | 0.85 (0.70, 1.02)                                 | 0.086                                         | 0.88 (0.71, 1.07)        | 0.203                                 | 0.84 (0.69, 1.02)        | 0.075                                         |                          |              |
| Tertile 3             | 0.81 (0.65, 1.01)                                 | 0.067                                         | <b>0.75 (0.58, 0.95)</b> | <b>0.020</b>                          | <b>0.79 (0.63, 0.99)</b> | <b>0.044</b>                                  |                          |              |
| P value for trend     |                                                   | <b>0.050</b>                                  |                          | <b>0.019</b>                          |                          | <b>0.032</b>                                  |                          |              |

*Abbreviations:* MIND, Mediterranean-Dietary Approaches to Stop Hypertension Intervention for Neurodegenerative Delay; HR, hazard ratios; CI, confidence interval.

<sup>a</sup> Models are adjusted for age, sex, Townsend deprivation index, body mass index, education, race, smoking status, physical activity, cancer history, total energy, and total sugar.

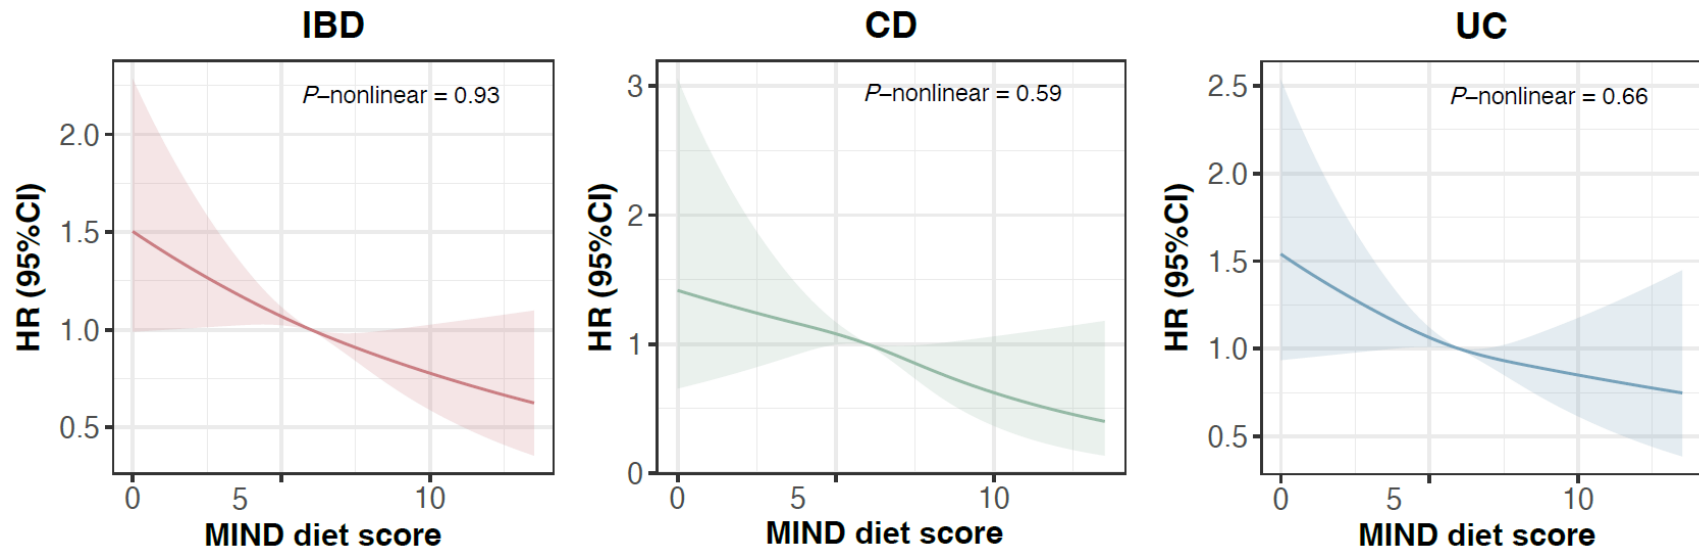

**Figure S1. Restricted cubic spline of the association between MIND diet score and risk of IBD, CD, and UC.** *Abbreviations:* MIND, Mediterranean-Dietary Approaches to Stop Hypertension Intervention for Neurodegenerative Delay; IBD, inflammatory bowel disease; CD, Crohn's disease; UC, ulcerative colitis; HR, hazard ratios; CI, confidence interval.
