# Supplementary figures and images for: Greater adherence to the Mediterranean Dietary Approaches to Stop Hypertension Intervention for Neurodegenerative Delay (MIND) diet is associated with lower risk of inflammatory bowel disease: a prospective cohort study
Source: Royal Society of Chemistry journal article supplement (doi:10.1039/d4fo00641k), 2024-01-01

**IBD**

**CD**

**UC**

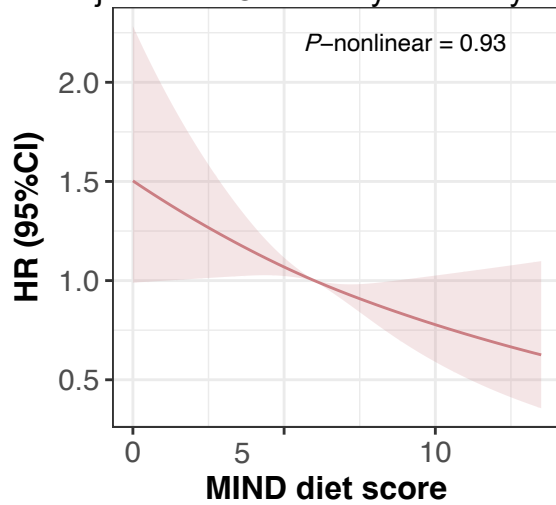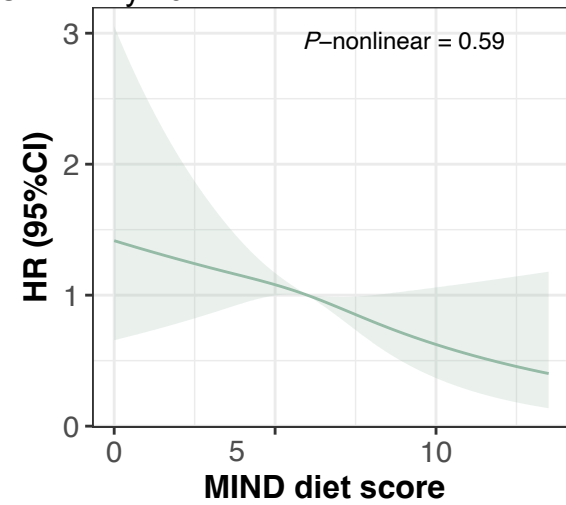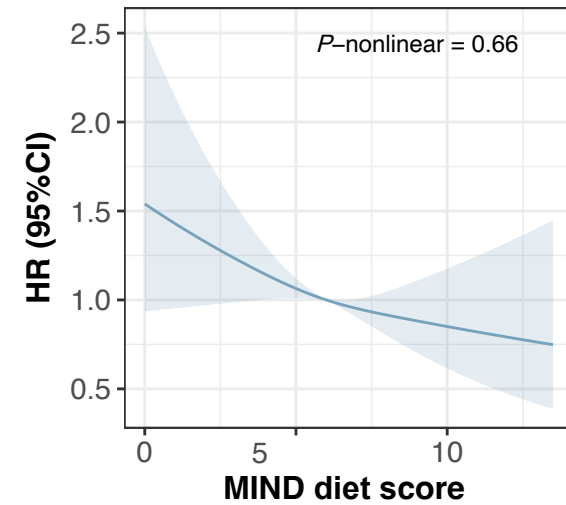

Supplement: d4fo00641k2.pdf [file d4fo00641k2.pdf]
